# Supplementary material for: Reanalysis on Phylogeographic Pattern of Sharpbelly Hemiculter leucisculus (Cyprinidae: Cultrinae) in China: A Review and the Implications for Conservation
Source: Frontiers journal article supplement (doi:10.3389/fevo.2022.865089), 2022-06-07
Supplement: Data_Sheet_1.XLSX [file Data_Sheet_1.XLSX]

## Sheet: Sheet1
Sequence information including the GenBank accession number, species name, sampling locations, specimens number and ID for reconstructing the phylogenetic tree and haplotype network based on 1070 cytb sequences and 146 RAG2 sequences of H. leucisculus, as well as the outgroup (H. bleekeri and C. alburnus)
Locality (number)	Lon	Lat	Drainage	Sample size	ID	cytb	RAG2
Gongguoqiao, Dali, Yunnan	99.3246	25.5968	Lancangjiang R.	13	LA1	KY292638	KY292985
					LA2	KY292644
					LA3	KY292645
					LA4	KY292646
					LA5	KY292647
					LA6	KY292648
					LA7	KY292649
					LA9	KY292650
					LA10	KY292639
					LA16	KY292640
					LA17	KY292641	KY292986
					LA18	KY292642
					LA19	KY292643	KY292987
Wutongqiao, Leshan, Sichuan	103.802	29.3856	Yangtze R.	18	WTQ10	KF021132
					WTQ11	KF021133
					WTQ12	KF021134
					WTQ13	KF021135
					WTQ14	KF021136
					WTQ15	KF021137
					WTQ16	KF021138
					WTQ17	KF021139
					WTQ18	KF021140
					WTQ19	KF021141
					WTQ1	KF021142
					WTQ2	KF021143
					WTQ3	KF021144
					WTQ4	KF021145
					WTQ5	KF021146
					WTQ6	KF021147
					WTQ7	KF021148
					WTQ8	KF021149
Luzhou, Sichuan	105.407	28.8617	Yangtze R.	37	LZ10	KF021040
					LZ11	KF021041
					LZ12	KF021042
					LZ13	KF021043
					LZ14	KF021044
					LZ15	KF021045
					LZ19	KF021046
					LZ1	KF021047	KY292990
					LZ20	KF021048
					LZ21	KF021049
					LZ23	KF021050
					LZ25	KF021051
					LZ26	KF021052
					LZ27	KF021053
					LZ28	KF021054
					LZ29	KF021055
					LZ2	KF021056	KY292991
					LZ30	KF021057	KY292992
					LZ31	KF021058
					LZ32	KF021059	KY292993
					LZ33	KF021060
					LZ34	KF021061	KY292994
					LZ35	KF021062
					LZ36	KF021063
					LZ37	KF021064
					LZ38	KF021065	KY292995
					LZ39	KF021066
					LZ3	KF021067
					LZ40	KF021068
					LZ41	KF021069	KY292997
					LZ42	KF021070
					LZ4	KF021071	KY292996
					LZ5	KF021072
					LZ6	KF021073
					LZ7	KF021074	KY292998
					LZ8	KF021075	KY292999
					LZ9	KF021076
Hejiang, Luzhou, Sichuan	105.83	28.8204	Yangtze R.	5	HJ1	KF021217
					HJ2	KF021218
					HJ3	KF021219
					HJ4	KF021220	KY292980
					HJ5	KF021221
Mudong, Chongqing	106.843	29.5809	Yangtze R.	28	MD10	KF021077
					MD12	KF021078	KY293002
					MD13	KF021079
					MD15	KF021080
					MD16	KF021081
					MD17	KF021082
					MD19	KF021083	KY293003
					MD1	KF021084	KY293001
					MD20	KF021085
					MD21	KF021086
					MD22	KF021087
					MD23	KF021088
					MD25	KF021089
					MD28	KF021090
					MD29	KF021091
					MD2	KF021092
					MD30	KF021093
					MD31	KF021094	KY293004
					MD33	KF021095
					MD34	KF021096
					MD35	KF021097
					MD36	KF021098
					MD3	KF021099
					MD4	KF021100
					MD5	KF021101	KY293005
					MD6	KF021102
					MD8	KF021103
					MD9	KF021104	KY293006
Zigui, Yichang, Hubei	110.986	30.8439	Yangtze R.	35	ZG36	KF021210	KY293013
					ZG35	KF021209
					ZG34	KF021208
					ZG33	KF021207
					ZG32	KF021206
					ZG31	KF021205
					ZG30	KF021204
					ZG29	KF021202
					ZG28	KF021201
					ZG27	KF021200
					ZG26	KF021199
					ZG25	KF021198
					ZG24	KF021197
					ZG23	KF021196
					ZG22	KF021195
					ZG21	KF021194
					ZG20	KF021193
					ZG19	KF021191
					ZG18	KF021190
					ZG17	KF021189
					ZG16	KF021188
					ZG15	KF021187
					ZG14	KF021186
					ZG13	KF021185
					ZG12	KF021184
					ZG11	KF021183
					ZG10	KF021182
					ZG9	KF021216
					ZG8	KF021215
					ZG7	KF021214
					ZG5	KF021213
					ZG4	KF021212
					ZG3	KF021211
					ZG2	KF021203
					ZG1	KF021192
Dongting Lake, Yueyang, Hunan	112.893	29.2669	Yangtze R.	30	DTH10	KF020928
					DTH11	KF020929
					DTH12	KF020930
					DTH13	KF020931
					DTH15	KF020932
					DTH16	KF020933
					DTH17	KF020934
					DTH18	KF020935
					DTH1	KF020936
					DTH20	KF020937
					DTH21	KF020938
					DTH22	KF020939
					DTH23	KF020940
					DTH24	KF020941
					DTH25	KF020942
					DTH26	KF020943
					DTH27	KF020944
					DTH28	KF020945
					DTH29	KF020946	KY292978
					DTH2	KF020947
					DTH30	KF020948
					DTH31	KF020949
					DTH32	KF020950
					DTH33	KF020951
					DTH34	KF020952
					DTH3	KF020953
					DTH5	KF020954
					DTH7	KF020955
					DTH8	KF020956
					DTH9	KF020957
Honghu Lake, Jingzhou, Hubei	113.318	29.813	Yangtze R.	26	HHL11	KF020958
					HHL12	KF020959
					HHL13	KF020960
					HHL15	KF020961
					HHL16	KF020962
					HHL17	KF020963
					HHL18	KF020964
					HHL1	KF020965
					HHL21	KF020966
					HHL22	KF020967
					HHL23	KF020968
					HHL24	KF020969
					HHL25	KF020970
					HHL26	KF020971
					HHL27	KF020972
					HHL28	KF020973
					HHL29	KF020974
					HHL2	KF020975
					HHL30	KF020976
					HHL31	KF020977
					HHL3	KF020978
					HHL4	KF020979
					HHL5	KF020980
					HHL6	KF020981	KY292979
					HHL8	KF020982
					HHL9	KF020983
Jiayu, Xianning, Hubei	113.882	30.1869	Yangtze R.	5	JY1	KF020984
					JY2	KF020985
					JY3	KF020986
					JY4	KF020987
					JY6	KF020988
Jingkou, Wuhan, Hubei	114.115	30.3302	Yangtze R.	10	JK11	KF020989
					JK18	KF020990
					JK1	KF020991
					JK2	KF020992
					JK3	KF020993
					JK46	KF020994
					JK4	KF020995
					JK5	KF020996
					JK6	KF020997
					JK9	KF020998
Donghu, Wuhan, Hubei	114.38	30.5537	Yangtze R.	29	DH10	KF020899	KY292972
					DH11	KF020900
					DH12	KF020901
					DH13	KF020902
					DH14	KF020903	KY292973
					DH15	KF020904
					DH16	KF020905
					DH17	KF020906
					DH18	KF020907
					DH19	KF020908	KY292974
					DH1	KF020909
					DH20	KF020910	KY292975
					DH21	KF020911
					DH22	KF020912
					DH23	KF020913
					DH24	KF020914
					DH25	KF020915
					DH26	KF020916
					DH28	KF020917
					DH29	KF020918
					DH2	KF020919
					DH30	KF020920
					DH3	KF020921
					DH4	KF020922
					DH5	KF020923
					DH6	KF020924	KY292976
					DH7	KF020925
					DH8	KF020926
					DH9	KF020927	KY292977
Liangzhihu Lake, Ezhou, Hubei	114.51	30.2307	Yangtze R.	41	LZH11	KF020999
					LZH12	KF021000
					LZH13	KF021001
					LZH14	KF021002
					LZH15	KF021003
					LZH16	KF021004
					LZH18	KF021005
					LZH19	KF021006
					LZH1	KF021007
					LZH20	KF021008
					LZH22	KF021009
					LZH24	KF021010
					LZH25	KF021011
					LZH26	KF021012
					LZH27	KF021013
					LZH2	KF021014
					LZH31	KF021015
					LZH33	KF021016
					LZH34	KF021017
					LZH37	KF021018
					LZH38	KF021019
					LZH39	KF021020
					LZH3	KF021021
					LZH40	KF021022
					LZH41	KF021023
					LZH42	KF021024
					LZH43	KF021025
					LZH44	KF021026
					LZH45	KF021027
					LZH46	KF021028
					LZH47	KF021029
					LZH48	KF021030
					LZH49	KF021031
					LZH4	KF021032
					LZH50	KF021033
					LZH51	KF021034
					LZH53	KF021035
					LZH54	KF021036	KY293000
					LZH6	KF021037
					LZH7	KF021038
					LZH9	KF021039
Wuxue, Huanggang, Hubei	115.573	29.8378	Yangtze R.	31	WX10	KF021151
					WX11	KF021152
					WX12	KF021153
					WX13	KF021154
					WX14	KF021155
					WX15	KF021156
					WX16	KF021157	KY293011
					WX17	KF021158
					WX18	KF021159
					WX19	KF021160
					WX1	KF021161
					WX20	KF021162
					WX21	KF021163
					WX22	KF021164
					WX23	KF021165
					WX24	KF021166
					WX26	KF021167
					WX27	KF021168
					WX2	KF021169
					WX30	KF021170
					WX31	KF021171
					WX32	KF021172
					WX33	KF021173
					WX35	KF021174
					WX3	KF021175
					WX4	KF021176
					WX5	KF021177
					WX6	KF021178
					WX7	KF021179
					WX8	KF021180
					WX9	KF021181
Xingzi, Jiujiang, Jiangxi	116.041	29.443	Yangtze R.	1	XZ1	KF021131	KY293012
Duchang, Jiujiang, Jiangxi	116.2	29.2389	Yangtze R.	20	DC10	KF021105
					DC11	KF021106
					DC12	KF021107
					DC13	KF021108
					DC14	KF021109
					DC15	KF021110
					DC16	KF021111
					DC17	KF021112
					DC18	KF021113
					DC19	KF021114	KY292971
					DC1	KF021115	KY292970
					DC20	KF021116
					DC2	KF021117
					DC3	KF021118
					DC4	KF021119
					DC5	KF021120
					DC6	KF021121
					DC7	KF021122
					DC8	KF021123
					DC9	KF021124
Hukou, Jiujiang, Jiangxi	29.7084	116.185	Yangtze R.	6	HK1	KF021125
					HK2	KF021126
					HK3	KF021127
					HK4	KF021128
					HK5	KF021129	KY292981
					HK6	KF021130
Chongqing	29.4124	105.583	Yangtze R.	17	CQ18	MW006140
					CQ29	MW006141
					CQ31	MW006142
					CQ34	MW006143
					CQ35	MW006144
					CQ36	MW006145
					CQ37	MW006146
					CQ40	MW006147
					CQ42	MW006148
					CQ43	MW006149
					CQ44	MW006150
					CQ45	MW006151
					CQ46	MW006152
					CQ47	MW006153
					CQ49	MW006154
					CQ51	MW006155
					CQ53	MW006156
Kunming, Yunnan	24.7693	102.701	Yangtze R.	13	KM004	MW006212
					KM005	MW006213
					KM007	MW006214
					KM008	MW006215
					KM011	MW006216
					KM014	MW006217
					KM015	MW006218
					KM018	MW006219
					KM019	MW006220
					KM022	MW006221
					KM027	MW006222
					KM028	MW006223
					KM029	MW006224
Qujiang, Guizhou	25.2764	104.81	Yangtze R.	19	QJ43	MW006260
					QJ44	MW006261
					QJ59	MW006262
					QJ81	MW006263
					QJ89	MW006264
					QJ103	MW006265
					QJ113	MW006266
					QJ116	MW006267
					QJ118	MW006268
					QJ148	MW006269
					QJ151	MW006270
					QJ152	MW006271
					QJ156	MW006272
					QJ158	MW006273
					QJ159	MW006274
					QJ162	MW006275
					QJ170	MW006276
					QJ432	MW006277
					QJ442	MW006278
Taihu, Zhejiang	30.9496	120.144	Yangtze R.	12	TH6	MW006333
					TH11	MW006334
					TH15	MW006335
					TH32	MW006340
					TH38	MW006342
					TH46	MW006343
					TH51	MW006344
					TH57	MW006345
					TH58	MW006346
					TH59	MW006347
					TH69	MW006348
					TH157	MW006357
Tongling, Anhui	31.0824	117.874	Yangtze R.	20	TL11	MW006360
					TL13	MW006361
					TL14	MW006362
					TL16	MW006363
					TL18	MW006364
					TL21	MW006366
					TL25	MW006368
					TL29	MW006370
					TL35	MW006373
					TL41	MW006375
					TL43	MW006376
					TL45	MW006377
					TL51	MW006378
					TL62	MW006379
					TL63	MW006380
					TL72	MW006381
					TL93	MW006383
					TL112	MW006385
					TL148	MW006388
					TL163	MW006390
Wuhan, Hubei	30.479	114.375	Yangtze R.	19	WH08	MW006391
					WH12	MW006392
					WH13	MW006393
					WH15	MW006394
					WH18	MW006395
					WH19	MW006396
					WH20	MW006397
					WH22	MW006398
					WH23	MW006399
					WH24	MW006400
					WH43	MW006401
					WH44	MW006402
					WH45	MW006403
					WH50	MW006404
					WH53	MW006405
					WH62	MW006406
					WH63	MW006407
					WH64	MW006408
					WH65	MW006409
Datong, Shanxi	39.9871	113.538	Yellow R.	20	DT002	MW006157
					DT003	MW006158
					DT005	MW006159
					DT006	MW006160
					DT007	MW006161
					DT009	MW006162
					DT010	MW006163
					DT012	MW006164
					DT013	MW006165
					DT014	MW006166
					DT017	MW006167
					DT021	MW006168
					DT025	MW006169
					DT026	MW006170
					DT028	MW006171
					DT030	MW006172
					DT033	MW006173
					DT034	MW006174
					DT035	MW006175
					DT041	MW006176
Kaifeng, Henan	34.4704	114.213	Yellow R.	19	KF4	MW006193
					KF5	MW006194
					KF8	MW006195
					KF13	MW006196
					KF18	MW006197
					KF19	MW006198
					KF23	MW006199
					KF26	MW006200
					KF31	MW006201
					KF34	MW006202
					KF35	MW006203
					KF37	MW006204
					KF39	MW006205
					KF43	MW006206
					KF45	MW006207
					KF46	MW006208
					KF47	MW006209
					KF49	MW006210
					KF50	MW006211
Luoyang, Henan	34.4112	112.272	Yellow R.	19	LY2	MW006225
					LY3	MW006226
					LY4	MW006227
					LY13	MW006228
					LY11	MW006229
					LY12	MW006230
					LY14	MW006231
					LY15	MW006232
					LY16	MW006233
					LY17	MW006234
					LY18	MW006235
					LY20	MW006236
					LY21	MW006237
					LY22	MW006238
					LY23	MW006239
					LY24	MW006240
					LY25	MW006241
					LY26	MW006242
					LY27	MW006243
Qianxian, Shannxi	34.5463	108.071	Yellow R.	17	QX003	MW006296
					QX008	MW006297
					QX009	MW006298
					QX018	MW006299
					QX024	MW006300
					QX025	MW006301
					QX027	MW006302
					QX030	MW006303
					QX038	MW006304
					QX042	MW006305
					QX045	MW006306
					QX046	MW006307
					QX050	MW006308
					QX051	MW006309
					QX052	MW006310
					QX053	MW006311
					QX054	MW006312
Taigu, Shanxi	37.4316	112.584	Yellow R.	19	TG03	MW006313
					TG05	MW006314
					TG09	MW006315
					TG11	MW006316
					TG13	MW006317
					TG16	MW006318
					TG22	MW006319
					TG23	MW006320
					TG24	MW006321
					TG31	MW006322
					TG32	MW006323
					TG36	MW006324
					TG37	MW006325
					TG39	MW006326
					TG42	MW006327
					TG45	MW006328
					TG46	MW006329
					TG61	MW006330
					TG62	MW006331
Xian, Shannxi	34.3285	109.052	Yellow R.	37	XA403	MW006410
					XA405	MW006411
					XA406	MW006412
					XA411	MW006413
					XA412	MW006414
					XA413	MW006415
					XA415	MW006416
					XA416	MW006417
					XA417	MW006418
					XA418	MW006419
					XA419	MW006420
					XA421	MW006421
					XA423	MW006422
					XA425	MW006423
					XA426	MW006424
					XA429	MW006425
					XA431	MW006426
					XA433	MW006427
					XA903	MW006428
					XA904	MW006429
					XA907	MW006430
					XA910	MW006431
					XA911	MW006432
					XA914	MW006433
					XA918	MW006434
					XA924	MW006435
					XA928	MW006436
					XA930	MW006437
					XA934	MW006438
					XA936	MW006439
					XA942	MW006440
					XA944	MW006441
					XA945	MW006442
					XA959	MW006443
					XA963	MW006444
					XA964	MW006445
					XA968	MW006446
Zoucheng, Shandong	35.5052	117.131	Yellow R.	16	ZC3	MW006447
					ZC5	MW006448
					ZC7	MW006449
					ZC8	MW006450
					ZC10	MW006451
					ZC14	MW006452
					ZC16	MW006453
					ZC17	MW006454
					ZC18	MW006455
					ZC20	MW006456
					ZC23	MW006457
					ZC24	MW006458
					ZC25	MW006459
					ZC28	MW006461
					ZC29	MW006462
					ZC30	MW006463
Danhepu, Jiyuan, Henan	35.1239	112.968	Yellow R.	16	DHP1	ON315395	ON315800
					DHP2	ON315396	ON315801
					DHP4	ON315397	ON315802
					DHP5	ON315398	ON315803
					DHP7	ON315399	ON315804
					DHP8	ON315400	ON315805
					DHP9	ON315401	ON315806
					DHP11	ON315402
					DHP12	ON315403
					DHP13	ON315404
					DHP14	ON315405
					DHP15	ON315406
					DHP16	ON315407
					DHP18	ON315408
					DHP19	ON315409
					DHP20	ON315410
Huangsiyuchang, Xinxiang, Henan	34.9759	113.849	Yellow R.	14	HSYC1	ON315411
					HSYC3	ON315412
					HSYC4	ON315413
					HSYC5	ON315414
					HSYC7	ON315415
					HSYC9	ON315416
					HSYC10	ON315417
					HSYC11	ON315418
					HSYC12	ON315419
					HSYC13	ON315420
					HSYC14	ON315421
					HSYC15	ON315422
					HSYC16	ON315423
					HSYC18	ON315424
Jindihe River, Puyang, Henan	35.0851	114.334	Yellow R.	9	JDH1	ON315425	ON315807
					JDH2	ON315426	ON315808
					JDH3	ON315427	ON315809
					JDH4	ON315428	ON315810
					JDH5	ON315429	ON315811
					JDH6	ON315430	ON315812
					JDH9	ON315431	ON315813
					JDH10	ON315432	ON315814
					JDH12	ON315433
Qinglong Lake, Xinxiang, Henan	34.9477	114.601	Yellow R.	27	QLH1	ON315434
					QLH2	ON315435
					QLH3	ON315436
					QLH4	ON315437
					QLH5	ON315438
					QLH6	ON315439
					QLH7	ON315440
					QLH8	ON315441
					QLH9	ON315442
					QLH10	ON315443
					QLH11	ON315444
					QLH12	ON315445
					QLH13	ON315446
					QLH14	ON315447
					QLH15	ON315448
					QLH16	ON315449
					QLH17	ON315450
					QLH18	ON315451
					QLH19	ON315452
					QLH20	ON315453
					QLH21	ON315454
					QLH22	ON315455
					QLH23	ON315456
					QLH24	ON315457
					QLH25	ON315458
					QLH26	ON315459
					QLH27	ON315460
Sundongzhai, Xinxiang, Henan	35.1405	114.586	Yellow R.	16	SDZ1	ON315461	ON315815
					SDZ2	ON315462	ON315816
					SDZ3	ON315463	ON315817
					SDZ4	ON315464	ON315818
					SDZ5	ON315465	ON315819
					SDZ6	ON315466
					SDZ7	ON315467
					SDZ8	ON315468
					SDZ9	ON315469
					SDZ10	ON315470
					SDZ12	ON315471
					SDZ13	ON315472
					SDZ15	ON315473
					SDZ17	ON315474
					SDZ18	ON315475
					SDZ19	ON315476
Puyang, Henan	36.1213	115.091	Yellow R.	19	YCZ1	ON315477	ON315820
					YCZ2	ON315478	ON315821
					YCZ3	ON315479	ON315822
					YCZ4	ON315480
					YCZ5	ON315481
					YCZ6	ON315482
					YCZ7	ON315483
					YCZ9	ON315484
					YCZ10	ON315485
					YCZ11	ON315486
					YCZ12	ON315487
					YCZ13	ON315488
					YCZ14	ON315489
					YCZ15	ON315490
					YCZ16	ON315491
					YCZ17	ON315492
					YCZ19	ON315493
					YCZ20	ON315494
					YCZ22	ON315495
Zhangwu Reservoir, Anyang	36.0962	114.143	Yellow R.	15	ZWSK2	ON315496
					ZWSK3	ON315497
					ZWSK4	ON315498
					ZWSK5	ON315499
					ZWSK6	ON315500
					ZWSK7	ON315501
					ZWSK8	ON315502
					ZWSK9	ON315503
					ZWSK10	ON315504
					ZWSK11	ON315505
					ZWSK12	ON315506
					ZWSK13	ON315507
					ZWSK14	ON315508
					ZWSK15	ON315509
					ZWSK16	ON315510
Yanshi, Luoyang, Henan	34.7079	112.63	Yellow R.	20	YS1	ON315511	ON315823
					YS2	ON315512	ON315824
					YS3	ON315513	ON315825
					YS4	ON315514	ON315826
					YS5	ON315515	ON315827
					YS6	ON315516	ON315828
					YS7	ON315517	ON315829
					YS8	ON315518	ON315830
					YS9	ON315519	ON315831
					YS10	ON315520	ON315832
					YS11	ON315521
					YS12	ON315522
					YS13	ON315523
					YS14	ON315524
					YS15	ON315525
					YS16	ON315526
					YS17	ON315527
					YS18	ON315528
					YS19	ON315529
					YS20	ON315530
Yichuan, Luoyang, Henan	34.3892	112.677	Yellow R.	19	YC1	ON315531	ON315833
					YC2	ON315532	ON315834
					YC3	ON315533	ON315835
					YC4	ON315534	ON315836
					YC5	ON315535	ON315837
					YC6	ON315536	ON315838
					YC7	ON315537	ON315839
					YC8	ON315538	ON315840
					YC9	ON315539
					YC10	ON315540
					YC11	ON315541
					YC12	ON315542
					YC13	ON315543
					YC14	ON315544
					YC15	ON315545
					YC16	ON315546
					YC17	ON315547
					YC18	ON315548
					YC19	ON315549
Zhaikou Reservoir, Sanmenxia, Henan	34.3453	110.743	Yellow R.	19	ZKSK1	ON315550
					ZKSK2	ON315551
					ZKSK3	ON315552
					ZKSK4	ON315553
					ZKSK5	ON315554
					ZKSK6	ON315555
					ZKSK7	ON315556
					ZKSK8	ON315557
					ZKSK9	ON315558
					ZKSK10	ON315559
					ZKSK11	ON315560
					ZKSK12	ON315561
					ZKSK13	ON315562
					ZKSK14	ON315563
					ZKSK15	ON315564
					ZKSK16	ON315565
					ZKSK17	ON315566
					ZKSK18	ON315567
					ZKSK19	ON315568
Yiliang, Kunming, Yunnan	24.8719	103.157	Pearl R.	12	NA1	KY292651	KY293007
					NA2	KY292657
					NA3	KY292658
					NA4	KY292659
					NA5	KY292660
					NA6	KY292661
					NA7	KY292662
					NA11	KY292652
					NA12	KY292653
					NA13	KY292654	KY293008
					NA14	KY292655
					NA16	KY292656
Tian’e, Hechi, Guangxi	24.9815	107.179	Pearl R.	13	TE10	KY292625
					TE11	KY292626
					TE12	KY292627
					TE13	KY292628
					TE14	KY292629
					TE18	KY292630
					TE2	KY292631
					TE4	KY292632
					TE5	KY292633
					TE6	KY292634	KY293009
					TE7	KY292635
					TE8	KY292636
					TE9	KY292637
Qinjiang, Guangxi			Pearl R.	1	qj	AY089711
Hengxian, Nanning, Guangxi	22.6811	109.257	Pearl R.	36	HX10	KY292574
					HX11	KY292575
					HX12	KY292576	KY292982
					HX13	KY292577
					HX14	KY292578
					HX15	KY292579
					HX16	KY292580
					HX17	KY292581
					HX18	KY292582
					HX19	KY292583
					HX1	KY292584
					HX20	KY292585
					HX21	KY292586
					HX22	KY292587
					HX24	KY292588
					HX25	KY292589
					HX26	KY292590
					HX27	KY292591
					HX28	KY292592	KY292983
					HX29	KY292593
					HX2	KY292594
					HX30	KY292595
					HX31	KY292596
					HX32	KY292597	KY292984
					HX33	KY292598
					HX34	KY292599
					HX35	KY292600
					HX36	KY292601
					HX37	KY292602
					HX3	KY292603
					HX4	KY292604
					HX5	KY292605
					HX6	KY292606
					HX7	KY292607
					HX8	KY292608
					HX9	KY292609
Lingshan, Qinzhou, Guangxi	22.4163	109.279	Pearl R.	15	LS10	KY292610
					LS11	KY292611
					LS12	KY292612
					LS14	KY292613	KY292988
					LS15	KY292614
					LS16	KY292615	KY292989
					LS17	KY292616
					LS1	KY292617
					LS2	KY292618
					LS3	KY292619
					LS4	KY292620
					LS5	KY292621
					LS6	KY292622
					LS7	KY292623
					LS8	KY292624
Bobai, Yulin, Guangxi	22.2344	109.914	Pearl R.	9	BB10	KY292565
					BB11	KY292566
					BB1	KY292567	KY292968
					BB2	KY292573
					BB3	KY292568
					BB4	KY292569
					BB5	KY292570
					BB6	KY292571	KY292969
					BB7	KY292572
Nanliujiang River;Beihai(Guangxi)	21.7064	109.178	Pearl R.	18	BH0502	MW006120
					BH0505	MW006122
					BH0513	MW006124
					BH0514	MW006125
					BH0515	MW006126
					BH0516	MW006127
					BH0517	MW006128
					BH0519	MW006129
					BH0525	MW006130
					BH0527	MW006131
					BH0528	MW006132
					BH0530	MW006133
					BH0536	MW006134
					BH0537	MW006135
					BH0540	MW006136
					BH0541	MW006137
					BH0542	MW006138
					BH0544	MW006139
Nandujiang, Hainan			Nanhai R.	1	ND_R	AY089709
Wanquanhe, Hainan			Nanhai R.	1	WQH	AY089710
Changhuajiang River, Hainan	19.2279	108.95	Changhuajiang River	16	HN2	MW006177
					HN4	MW006178
					HN5	MW006179
					HN7	MW006180
					HN10	MW006181
					HN13	MW006182
					HN14	MW006183
					HN21	MW006184
					HN29	MW006185
					HN30	MW006186
					HN38	MW006187
					HN39	MW006188
					HN41	MW006189
					HN42	MW006190
					HN44	MW006191
					HN45	MW006192
Shihe, Xinyang, Henan	31.8976	113.971	Huaihe R.	19	SH1	ON315569	ON315740
					SH2	ON315570	ON315741
					SH3	ON315571	ON315742
					SH4	ON315572	ON315743
					SH5	ON315573	ON315744
					SH7	ON315574	ON315745
					SH8	ON315575	ON315746
					SH9	ON315576	ON315747
					SH10	ON315577	ON315748
					SH11	ON315578
					SH12	ON315579
					SH13	ON315580
					SH14	ON315581
					SH15	ON315582
					SH16	ON315583
					SH17	ON315584
					SH18	ON315585
					SH19	ON315586
					SH20	ON315587
Nanwan Reservoir, Xinyang, Henan	32.1088	114.005	Huaihe R.	20	NWSK1	ON315588	ON315749
					NWSK2	ON315589	ON315750
					NWSK3	ON315590	ON315751
					NWSK4	ON315591	ON315752
					NWSK5	ON315592	ON315753
					NWSK6	ON315593	ON315754
					NWSK7	ON315594	ON315755
					NWSK8	ON315595	ON315756
					NWSK9	ON315596	ON315757
					NWSK10	ON315597	ON315758
					NWSK11	ON315598
					NWSK12	ON315599
					NWSK13	ON315600
					NWSK14	ON315601
					NWSK15	ON315602
					NWSK16	ON315603
					NWSK17	ON315604
					NWSK18	ON315605
					NWSK19	ON315606
					NWSK20	ON315607
Jiulonghe, Xinyang, Henan	31.9459	114.466	Huaihe R.	32	JLH1	ON315608	ON315759
					JLH2	ON315609	ON315760
					JLH3	ON315610	ON315761
					JLH4	ON315611	ON315762
					JLH5	ON315612	ON315763
					JLH6	ON315613	ON315764
					JLH7	ON315614	ON315765
					JLH9	ON315615	ON315766
					JLH10	ON315616	ON315767
					JLH11	ON315617
					JLH12	ON315618
					JLH13	ON315619
					JLH14	ON315620
					JLH15	ON315621
					JLH16	ON315622
					JLH17	ON315623
					JLH18	ON315624
					JLH19	ON315625
					JLH20	ON315626
					JLH21	ON315627
					JLH22	ON315628
					JLH23	ON315629
					JLH24	ON315630
					JLH26	ON315631
					JLH27	ON315632
					JLH28	ON315633
					JLH29	ON315634
					JLH30	ON315635
					JLH31	ON315636
					JLH32	ON315637
					JLH33	ON315638
					JLH34	ON315639
Huanghe, Xinyang, Henan	31.9889	114.922	Huaihe R.	40	XYHH1	ON315640	ON315768
					XYHH2	ON315641	ON315769
					XYHH3	ON315642	ON315770
					XYHH4	ON315643	ON315771
					XYHH5	ON315644	ON315772
					XYHH6	ON315645	ON315773
					XYHH7	ON315646	ON315774
					XYHH8	ON315647	ON315775
					XYHH9	ON315648	ON315776
					XYHH10	ON315649	ON315777
					XYHH11	ON315650
					XYHH12	ON315651
					XYHH13	ON315652
					XYHH14	ON315653
					XYHH15	ON315654
					XYHH16	ON315655
					XYHH17	ON315656
					XYHH18	ON315657
					XYHH19	ON315658
					XYHH20	ON315659
					XYHH21	ON315660
					XYHH22	ON315661
					XYHH23	ON315662
					XYHH24	ON315663
					XYHH25	ON315664
					XYHH26	ON315665
					XYHH27	ON315666
					XYHH28	ON315667
					XYHH29	ON315668
					XYHH30	ON315669
					XYHH31	ON315670
					XYHH32	ON315671
					XYHH33	ON315672
					XYHH34	ON315673
					XYHH35	ON315674
					XYHH36	ON315675
					XYHH37	ON315676
					XYHH38	ON315677
					XYHH39	ON315678
					XYHH40	ON315679
Huaihe, Xinyang, Henan	32.3549	115.255	Huaihe R.	34	LDK1	ON315680	ON315778
					LDK2	ON315681	ON315779
					LDK3	ON315682	ON315780
					LDK4	ON315683	ON315781
					LDK5	ON315684	ON315782
					LDK6	ON315685	ON315783
					LDK7	ON315686	ON315784
					LDK8	ON315687	ON315785
					LDK9	ON315688	ON315786
					LDK10	ON315689	ON315787
					LDK11	ON315690	ON315788
					LDK12	ON315691	ON315789
					LDK13	ON315692
					LDK14	ON315693
					LDK15	ON315694
					LDK16	ON315695
					LDK17	ON315696
					LDK18	ON315697
					LDK19	ON315698
					LDK20	ON315699
					LDK21	ON315700
					LDK22	ON315701
					LDK23	ON315702
					LDK24	ON315703
					LDK25	ON315704
					LDK26	ON315705
					LDK28	ON315706
					LDK29	ON315707
					LDK30	ON315708
					LDK31	ON315709
					LDK32	ON315710
					LDK33	ON315711
					LDK34	ON315712
					LDK35	ON315713
Guanhe River, Xinyang, Henan	31.6415	115.283	Huaihe R.	26	GH1	ON315714	ON315790
					GH2	ON315715	ON315791
					GH3	ON315716	ON315792
					GH4	ON315717	ON315793
					GH5	ON315718	ON315794
					GH7	ON315719	ON315795
					GH8	ON315720	ON315796
					GH9	ON315721	ON315797
					GH11	ON315722	ON315798
					GH12	ON315723	ON315799
					GH13	ON315724
					GH14	ON315725
					GH15	ON315726
					GH16	ON315727
					GH18	ON315728
					GH19	ON315729
					GH20	ON315730
					GH21	ON315731
					GH22	ON315732
					GH23	ON315733
					GH24	ON315734
					GH25	ON315735
					GH26	ON315736
					GH27	ON315737
					GH28	ON315738
					GH29	ON315739
Qiantangjiang, Zhejiang	30.0574N	119.9860E	Qiantangjiang R.	18	QTJ	AY089715
					QTJ1	MW006279
					QTJ4	MW006280
					QTJ5	MW006281
					QTJ6	MW006282
					QTJ8	MW006283
					QTJ9	MW006284
					QTJ10	MW006285
					QTJ16	MW006286
					QTJ18	MW006287
					QTJ21	MW006288
					QTJ27	MW006289
					QTJ30	MW006290
					QTJ39	MW006291
					QTJ50	MW006292
					QTJ71	MW006293
					QTJ74	MW006294
					QTJ82	MW006295
Lingjiang, Zhejiang			Lingjiang R.	1	LJ	AY089716
Minjiang, Fujian			Minjiang R.	1	MJ	AY089717
Jiulongjiang, Fujiang			Jiulongjiang R.	1	JLJ	AY089718
Hemiculter bleekeri					H. bleekeri1	KF029693	MH836842
Hemiculter bleekeri					H. bleekeri2	KU198332	KY292967
Culter alburnus					C. alburnus1	KX244762	MH836824
Culter alburnus					C. alburnus2	KX244761	MH836823
Culter alburnus					C. alburnus3	KM044500	DQ367004
